# Supplementary material for: The degree and depth limitation of deep soil desiccation and its impact on xylem hydraulic conductivity in dryland tree plantations
Source: Copernicus journal article supplement (doi:10.5194/hess-2023-12), 2023-01-31
Supplement: Supplementary file 1 [file hess-2023-12-supplement.pdf]

# **The degree and depth limitation of deep soil desiccation and its impact on xylem hydraulic conductivity in dryland tree plantations**

Nana He<sup>1</sup>, Xiaodong Gao<sup>2,3,4\*</sup>, Dagang Guo<sup>1</sup>, Yabiao Wu<sup>1</sup>, Dong Ge<sup>1</sup>, Lianhao Zhao<sup>2</sup>,  
Lei Tian<sup>5</sup>, Xining Zhao<sup>2,3,4</sup>

<sup>1</sup>College of Water Resources and Architectural Engineering, Northwest A&F University, 712100 Yangling, Shannxi Province, China

<sup>2</sup>Institute of Soil and Water Conservation, Chinese Academy of Science & Ministry of Water Resources, 712100, Yangling, Shaanxi Province, China

<sup>3</sup>Institute of Soil and Water Conservation, Northwest A&F University, 712100, Yangling, Shaanxi Province, China

<sup>4</sup>National Engineering Research Center of Water Saving and Irrigation Technology at Yangling, 712100, Shaanxi Province, China

<sup>5</sup>Institute of Green Development Yellow River Drainage Basin, Lanzhou University, 730000, Lanzhou, Gansu Province, China

\* Corresponding author at: No. 26, Xinong Road, Yangling, Shaanxi 712100, PR China

E-mail addresses: [gao\\_xiaodong@nwafu.edu.cn](mailto:gao_xiaodong@nwafu.edu.cn) (X. Gao).

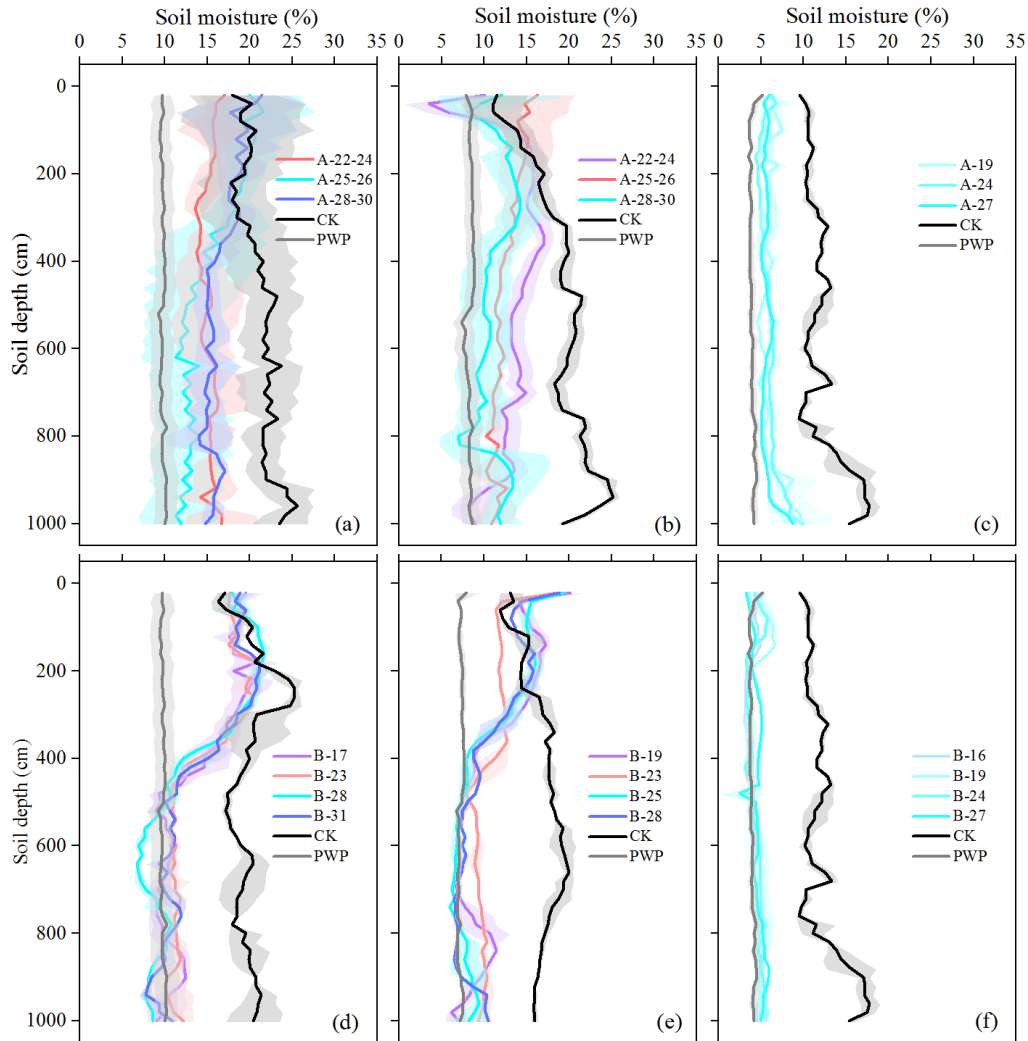

**Figure S1:** Soil moisture distribution under apple orchards of different ages in Changwu (a), Luochuan (b) and Mizhi (c), respectively; and black locust forests of different ages in Changwu (d), Yan'an (e) and Mizhi (f). The capital letters A and B in the legend represent apple and black locust, respectively, and the numbers after the letters represent tree age, for example, A-22 represents 22-year-old apple. CK represents soil moisture of grassland or farmland adjacent to plantations. In order to reduce the randomness of the literature data, the data for apples with similar ages in Changwu and Luochuan were combined to analysis. The gray line indicates the permanent wilting points (PWP) at each sampling site.

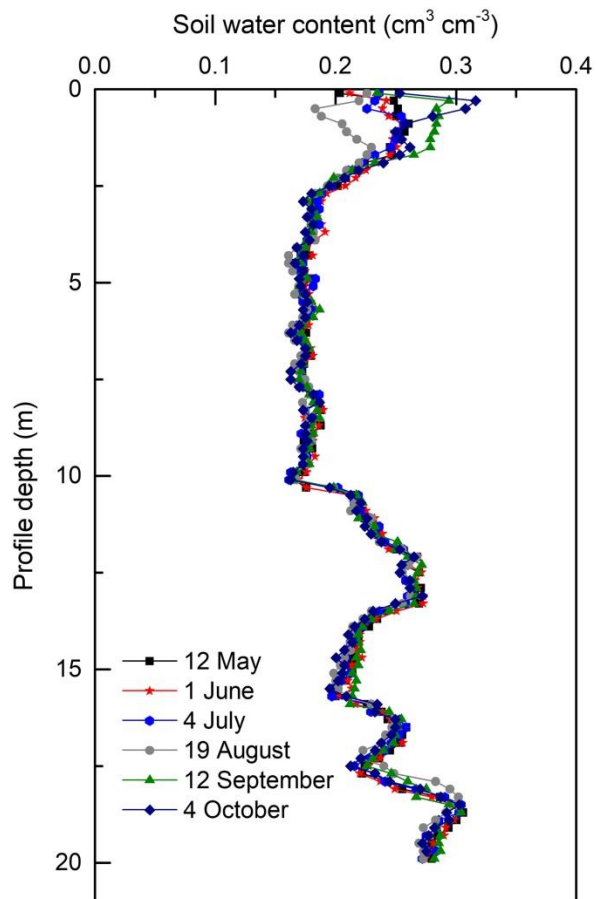

**Figure S2:** Soil water content from Li et al. (2019)
